# Supplementary figures and images for: Deterrent Effects of Essential Oils on Spotted-Wing Drosophila (Drosophila suzukii): Implications for Organic Management in Berry Crops
Source: MDPI journal article supplement (doi:10.3390/insects11080536), 2020-08-15

## GC-MS Analysis of *Nepeta cataria* Essential Oil

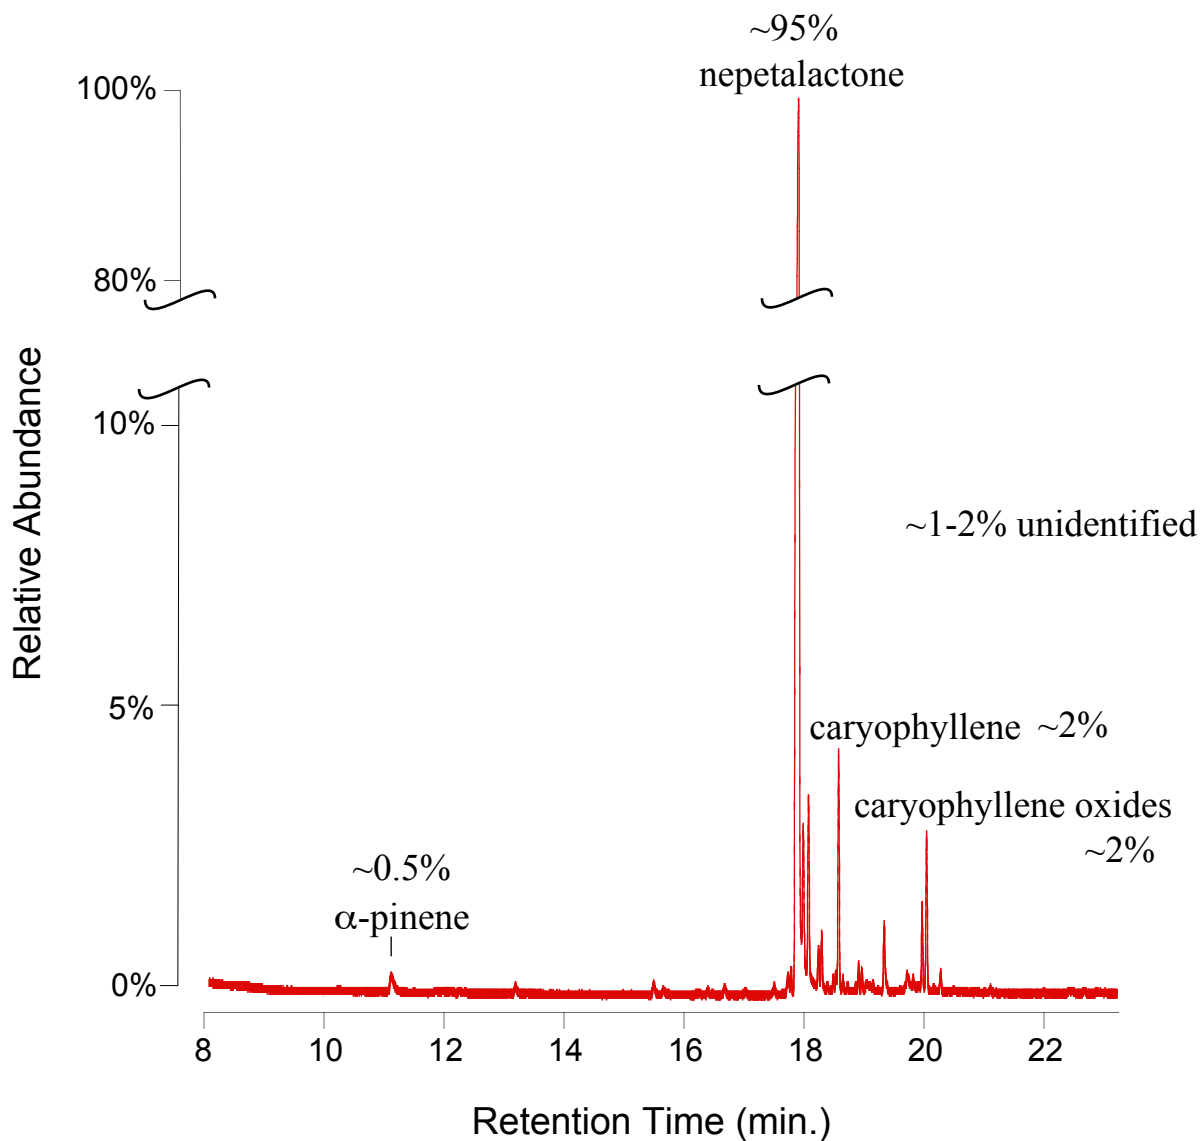

Supplement: s1 [file s1]
